# Supplementary material
Source: publisher figshare collection journal article supplement (https://aacr.figshare.com/articles/dataset/_/22487342)
Supplement: Supplementary file 1 [file 39938933]

Supplementary figures

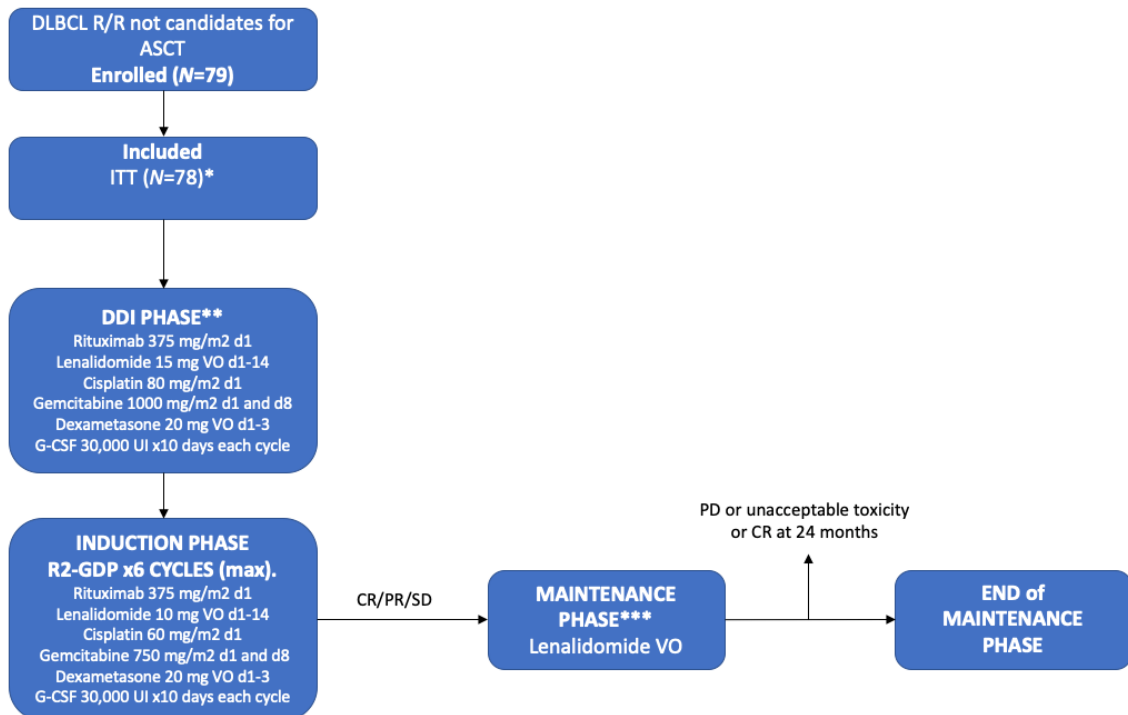

**Figure S1. Study design.** \* Voluntary withdrawal of one patient. \*\*R2-GDP as schedule not previously tested. Initial run in phase (DDI) period to evaluate toxicity and dose modifications. \*\*\* PO Lenalidomide 10 mg on days 1–21 for 28 days (or last lenalidomide dose received in induction phase). *DLBCL*= diffuse large B cell lymphoma. *R/R*= *relapsed/refractory*. *ASCT*=autologous stem cell transplant. *ITT*=intention to treat. *PPP*=per-protocol-population. *DDI*=drug-drug interaction.

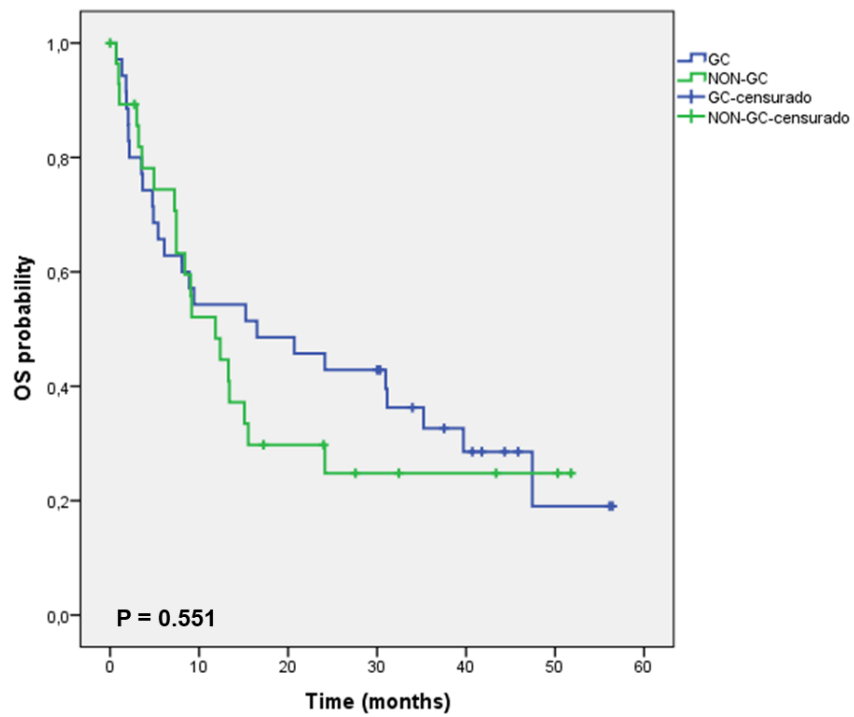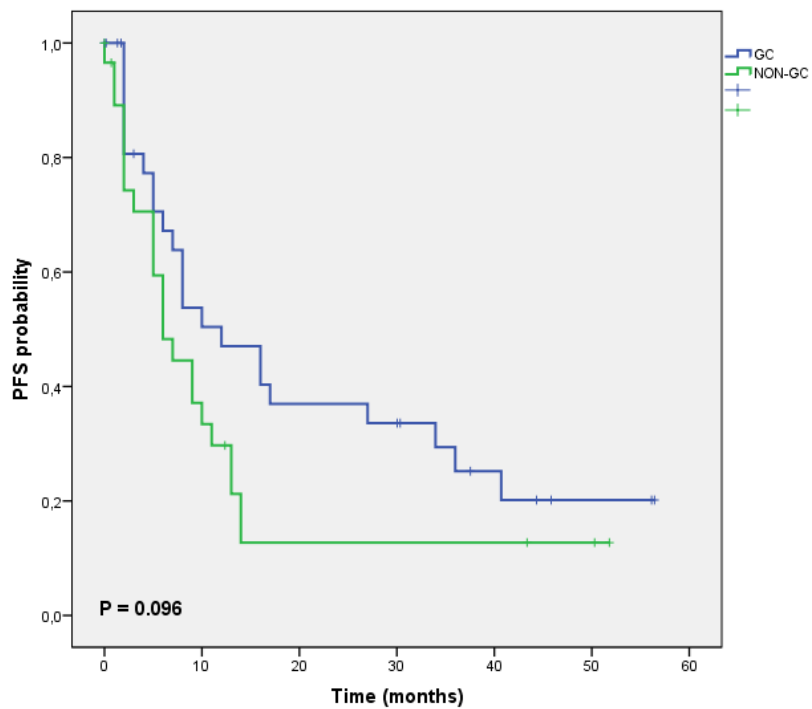

**Figure S2. Kaplan-Meier plots of overall survival (OS) and progression-free survival (PFS) according to the cell-of-origin (COO).** The vertical bar represents the PFS probability, while the horizontal bar represents the tumor follow-up time in months.

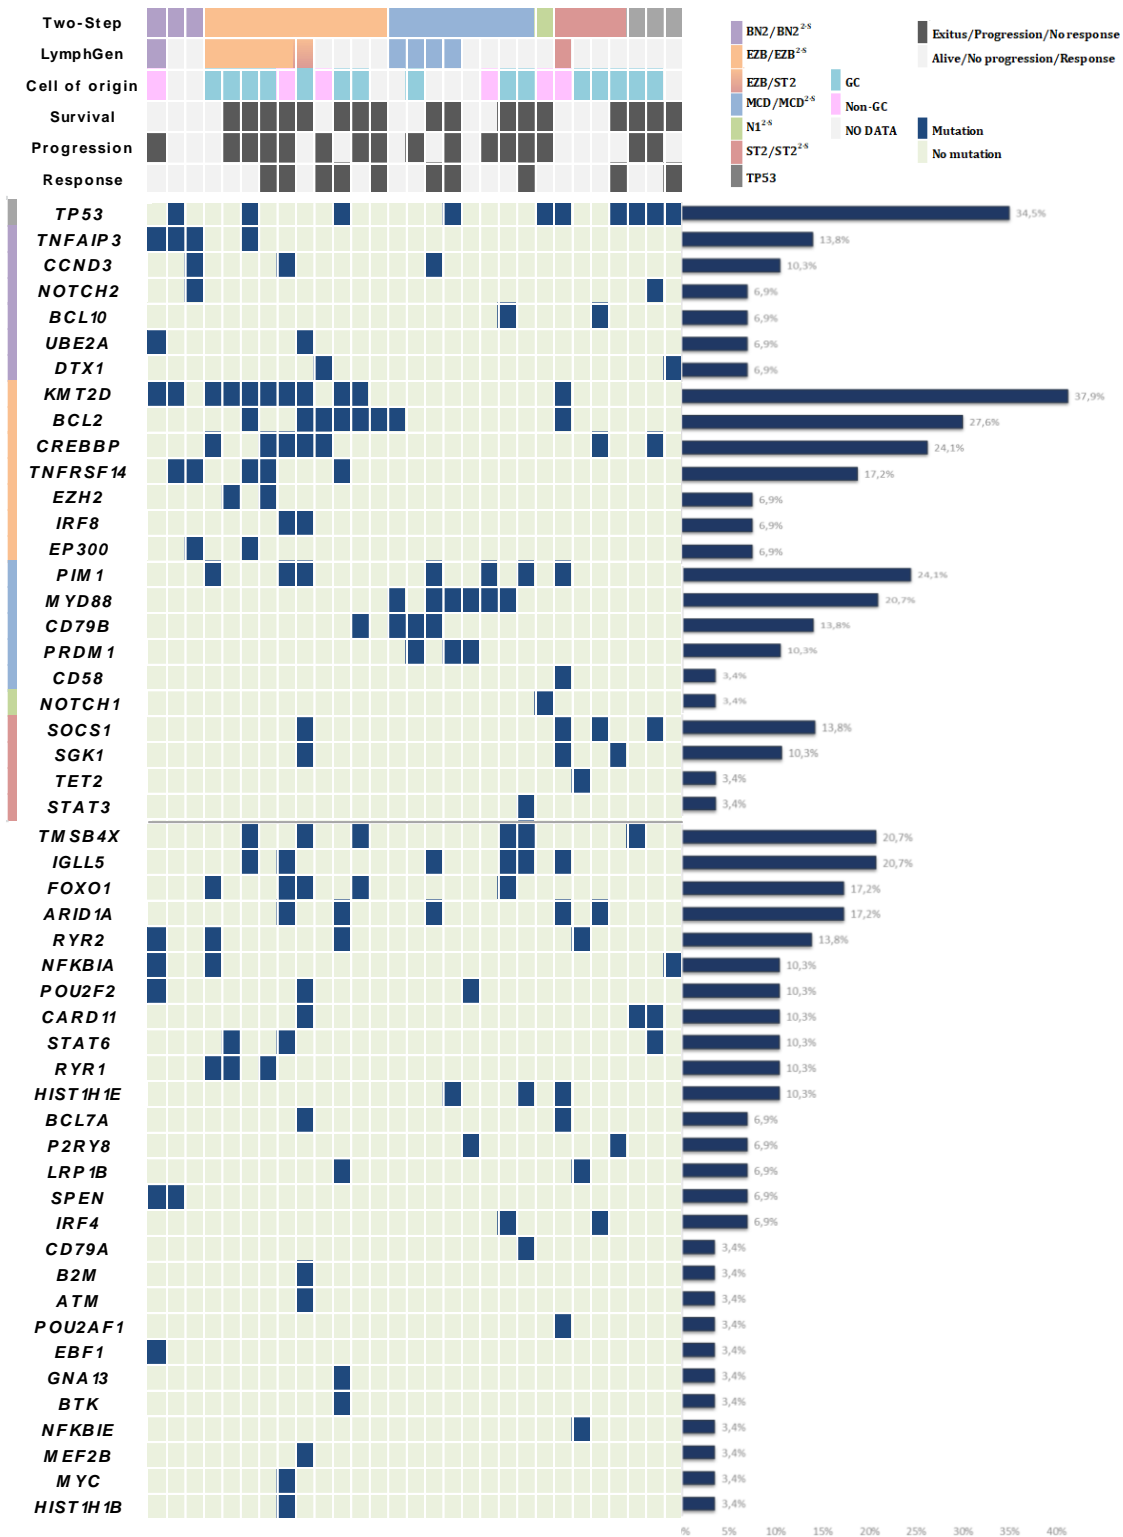

**Figure S3. Distribution of the mutated genes in the 29 DLBCL cases analyzed.** Each column represents an individual patient, and each row denotes a specific gene. The genetic classification in the six defined genetic subtypes of DLBCL, performed using the two-step (Pedrosa et al.) and LymphGene (Wright et al.) classifiers, and the GC/non-GC cell-of-origin classification based on Hans, are represented at the top. The bar graph shows the frequency of mutations found in each gene. GC: germinal center.

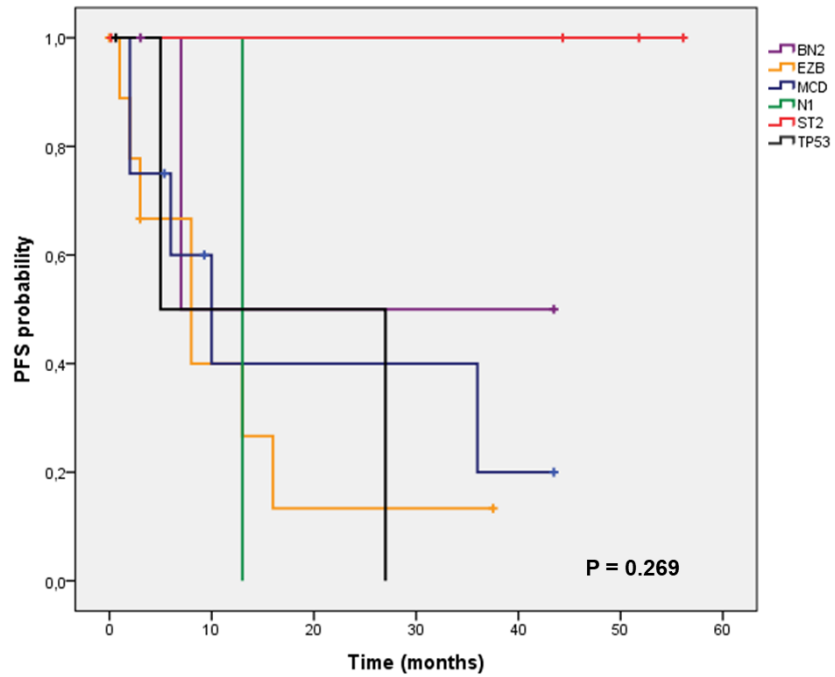

**Figure S4.** Kaplan-Meier plots of progression-free survival (PFS) according to genetic subtypes determined by the two-step classifier. The vertical bar represents the PFS probability, while the horizontal bar represents the tumor follow-up time in months.

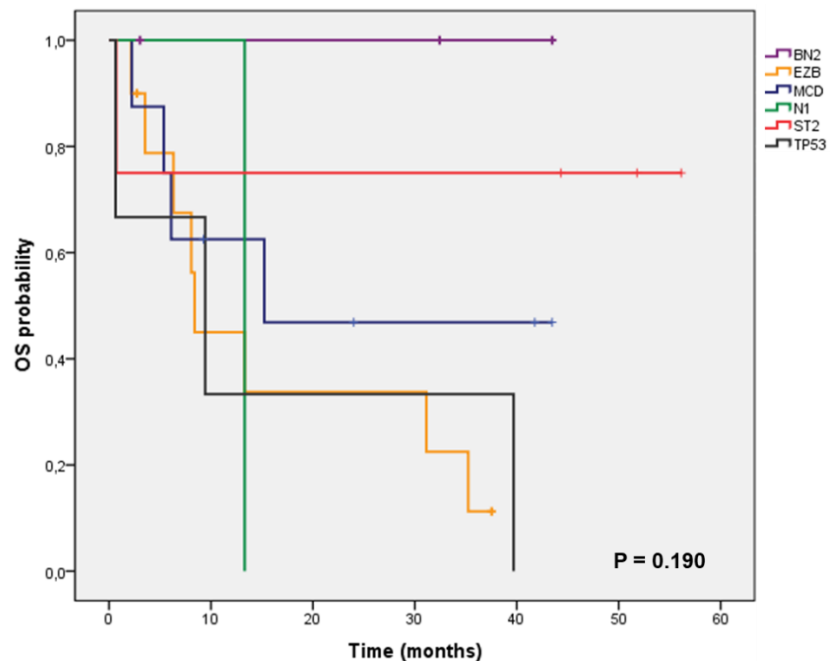

**Figure S5.** Kaplan-Meier plots of overall survival (OS) according to genetic subtypes determined by the two-step classifier. The vertical bar represents the OS probability, while the horizontal bar represents the tumor follow-up time in months.

**Supplementary tables**

| <b>Table S1. Response rates (%) ITT</b> | <b>R/R DLBCL N=78</b> | <b>Primary Refractory DLBCL N=33</b> |
|-----------------------------------------|-----------------------|--------------------------------------|
| <b>ORR</b>                              | 60.2                  | 45.5                                 |
| <b>CR</b>                               | 37.1                  | 21.2                                 |
| <b>PR</b>                               | 23.1                  | 24.3                                 |
| <b>SD</b>                               | 7.8                   | 12.1                                 |
| <b>PD</b>                               | 32.0                  | 42.4                                 |

ITT=intention to treat. R/R= relapsed or refractory. DLBCL=diffuse large B-cell lymphoma. ORR= overall response rate. CR= complete response. PR= partial response. SD= stabilization of disease. PD= progression of disease.

**Table S2. Response according to previous chemotherapy.**

| <b>Chemotherapy (number of lines)</b> | <b>SD (N=6)</b> | <b>PD (N=25)</b> | <b>CR (N=29)</b> | <b>PR (N=18)</b> | <b>Total (N=78)</b> | <b>p value*</b> |
|---------------------------------------|-----------------|------------------|------------------|------------------|---------------------|-----------------|
| 1                                     | 3<br>(50.0%)    | 14<br>(56.0%)    | 18<br>(62.1%)    | 8<br>(44.4%)     | 43<br>(55.1%)       | <b>0.356</b>    |
| 2                                     | 3<br>(50.0%)    | 7<br>(28.0%)     | 6<br>(20.7%)     | 9<br>(50.0%)     | 25<br>(32.1%)       |                 |
| 3                                     | 0<br>(0.0%)     | 3<br>(12.0%)     | 1<br>(3.4%)      | 0<br>(0.0%)      | 4<br>(5.1%)         |                 |
| 4                                     | 0<br>(0.0%)     | 1<br>(4.0%)      | 2<br>(6.9%)      | 0<br>(0.0%)      | 3<br>(3.8%)         |                 |
| 5                                     | 0<br>(0.0%)     | 0<br>(0.0%)      | 2<br>(6.9%)      | 0<br>(0.0%)      | 2<br>(2.6%)         |                 |
| 6                                     | 0<br>(0.0%)     | 0<br>(0.0%)      | 0<br>(0.0%)      | 1<br>(5.6%)      | 1<br>(1.3%)         |                 |

**Table S3.** Response according to previous chemotherapy (primary refractory disease only).

|                                       | <b>SD (N=3)</b> | <b>PD (N=14)</b> | <b>CR (N=10)</b> | <b>PR (N=6)</b> | <b>Total (N=33)</b> | <b>p value*</b> |
|---------------------------------------|-----------------|------------------|------------------|-----------------|---------------------|-----------------|
| <b>Chemotherapy (number of lines)</b> |                 |                  |                  |                 |                     | <b>0.210</b>    |
| 1                                     | 2 (66.7%)       | 10 (71.4%)       | 7 (70.0%)        | 1 (16.7%)       | 20 (60.6%)          |                 |
| 2                                     | 1 (33.3%)       | 3 (21.4%)        | 1 (10.0%)        | 5 (83.3%)       | 10 (30.3%)          |                 |
| 3                                     | 0 (0.0%)        | 1 (7.1%)         | 0 (0.0%)         | 0 (0.0%)        | 1 (3.0%)            |                 |
| 4                                     | 0 (0.0%)        | 0 (0.0%)         | 1 (10.0%)        | 0 (0.0%)        | 1 (3.0%)            |                 |
| 5                                     | 0 (0.0%)        | 0 (0.0%)         | 1 (10.0%)        | 0 (0.0%)        | 1 (3.0%)            |                 |
| 6                                     | 0 (0.0%)        | 0 (0.0%)         | 0 (0.0%)         | 0 (0.0%)        | 0 (0.0%)            |                 |

\* Chi-square test. SD: stabilization of the disease; PD: progression of the disease; CR; complete response; PR; partial response.

**Table S4.** Response according to IPI score.

|                 | <b>UK (N=16)</b> | <b>Low (N=13)</b> | <b>Intermediate (N=29)</b> | <b>High (N=20)</b> | <b>Total (N=78)</b> | <b>p value*</b> |
|-----------------|------------------|-------------------|----------------------------|--------------------|---------------------|-----------------|
| <b>Response</b> |                  |                   |                            |                    |                     | <b>0.118</b>    |
| SD              | 3 (18.8%)        | 0 (0.0%)          | 3 (10.3%)                  | 0 (0.0%)           | 6 (7.7%)            |                 |
| PD              | 4 (25.0%)        | 3 (23.1%)         | 7 (24.1%)                  | 11 (55.0%)         | 25 (32.1%)          |                 |
| CR              | 5 (31.2%)        | 8 (61.5%)         | 12 (41.4%)                 | 4 (20.0%)          | 29 (37.2%)          |                 |
| PR              | 4 (25.0%)        | 2 (15.4%)         | 7 (24.1%)                  | 5 (25.0%)          | 18 (23.1%)          |                 |

\* Chi-square test. SD: stabilization of the disease; PD: progression of the disease; CR; complete response; PR; partial response. Low: 0-1; Intermediate:2-3; High:4-5.

**Table S5.** Response according to IPI scale in primary refractory disease.

|                 | <b>UK (N=16)</b> | <b>Low (N=13)</b> | <b>Intermediate-low (N=16)</b> | <b>Intermediate-high (N=13)</b> | <b>High (N=20)</b> | <b>Total (N=78)</b> | <b>p value*</b> |
|-----------------|------------------|-------------------|--------------------------------|---------------------------------|--------------------|---------------------|-----------------|
| <b>Response</b> |                  |                   |                                |                                 |                    |                     | <b>0.242</b>    |
| SD              | 3 (18.8%)        | 0 (0.0%)          | 1 (6.2%)                       | 2 (15.4%)                       | 0 (0.0%)           | 6 (7.7%)            |                 |
| PD              | 4 (25.0%)        | 3 (23.1%)         | 4 (25.0%)                      | 3 (23.1%)                       | 11 (55.0%)         | 25 (32.1%)          |                 |
| CR              | 5 (31.2%)        | 8 (61.5%)         | 7 (43.8%)                      | 5 (38.5%)                       | 4 (20.0%)          | 29 (37.2%)          |                 |
| PR              | 4 (25.0%)        | 2 (15.4%)         | 4 (25.0%)                      | 3 (23.1%)                       | 5 (25.0%)          | 18 (23.1%)          |                 |

\* Chi-square test. SD: stabilization of the disease; PD: progression of the disease; CR; complete response; PR; partial response. Low: 0-1; Intermediate-low:2; Intermediate-high:3; High:4-5.

**Table S6.** Response according to COO subtype.

|                 | <b>GC (N=29)</b> | <b>Non-GC (N=45)</b> | <b>Total (N=74)</b> | <b>p value*</b> |
|-----------------|------------------|----------------------|---------------------|-----------------|
| <b>Response</b> |                  |                      |                     | <b>0.644</b>    |
| SD              | 3 (10.3%)        | 3 (6.7%)             | 6 (8.1%)            |                 |
| PD              | 8 (27.6%)        | 17 (37.8%)           | 25 (33.8%)          |                 |
| CR              | 13 (44.8%)       | 15 (33.3%)           | 28 (37.8%)          |                 |
| PR              | 5 (17.2%)        | 10 (22.2%)           | 15 (20.3%)          |                 |

\* Chi-square test. SD: stabilization of the disease; PD: progression of the disease; CR; complete response; PR; partial response.

**Table S8.** Response according to Lenalidomide dose.

|                 | <b>10 mg Lena (N=44)</b> | <b>5 mg Lena (N=34)</b> | <b>Total (N=78)</b> | <b>p value*</b> |
|-----------------|--------------------------|-------------------------|---------------------|-----------------|
| <b>Response</b> |                          |                         |                     | <b>0.058</b>    |
| SD              | 2 (4.5%)                 | 4 (11.8%)               | 6 (7.7%)            |                 |
| PD              | 19 (43.2%)               | 6 (17.6%)               | 25 (32.1%)          |                 |
| CR              | 16 (36.4%)               | 13 (38.2%)              | 29 (37.2%)          |                 |
| OR              | 7 (15.9%)                | 11 (32.4%)              | 18 (23.1%)          |                 |

\* Chi-square test. SD: stabilization of the disease; PD: progression of the disease; CR; complete response; PR; partial response.

**Table S9.** Dropouts due to toxicity during the induction phase stratified by lenalidomide dose.

|                | <b>10 mg Lena (N=44)</b> | <b>5 mg Lena (N=34)</b> | <b>Total (N=78)</b> | <b>p value*</b> |
|----------------|--------------------------|-------------------------|---------------------|-----------------|
| <b>Dropout</b> |                          |                         |                     | <b>0.353</b>    |
| NO             | 37 (84.1%)               | 31 (91.2%)              | 68 (87.2%)          |                 |
| YES            | 7 (15.9%)                | 3 (8.8%)                | 10 (12.8%)          |                 |

\* Chi-square test.

**Table S10.** Treatment-related deaths. C= Cycle, G =Grade, AEs = adverse events.

|          | <b>AA-death</b>        | <b>Cycle</b>   | <b>Lenalidomide Dose (mg)</b> | <b>Previous Neutropenia (Cycle, grade)</b> |
|----------|------------------------|----------------|-------------------------------|--------------------------------------------|
| <b>1</b> | G5 Febrile neutropenia | Induction (C2) | 15                            | No                                         |
| <b>2</b> | G5 Febrile neutropenia | Induction (C3) | 10                            | No                                         |
| <b>3</b> | G5 Febrile neutropenia | Induction (C3) | 5                             | Yes (C2, G3)                               |
| <b>4</b> | G5 Febrile neutropenia | Induction (C2) | 10                            | No                                         |

## Supplementary material and methods

### Genetic subtypes: Methods of targeted sequencing

Genomic DNA was extracted from FFPE using a truXTRAC FFPE DNA Kit (Covaris, Woburn, MA, USA) following the manufacturer's instructions. A SureSelect target enrichment custom panel was designed using the SureDesign (Agilent Technologies, Santa Clara, CA, USA) web-based tool ([earray.chem.agilent.com/suredesign/](http://earray.chem.agilent.com/suredesign/)). The design covered coding exons of the selected genes. The genes included (61) are involved in lymphomagenesis-relevant pathways and were selected based on previous studies (1-8). The targeted regions (according to Human Assembly GRCh38/hg38) were captured using a SureSelect XT-HS (Agilent), as described in the manufacturer's instructions. Captured libraries were diluted to 8 pM for Illumina clustering, and paired-end sequencing was performed on MiSeq sequencer (Illumina Inc., San Diego, CA, USA).

List of genes included in the targeted panel:

|          |        |          |
|----------|--------|----------|
| ARID1A   | IGLL5  | POU2AF1  |
| ATM      | IKBKB  | POU2F2   |
| B2M      | IKZF3  | PRDM1    |
| BCL10    | IRF4   | RYR1     |
| BCL2     | IRF8   | RYR2     |
| BCL6     | KMT2D  | S1PR2    |
| BCL7A    | LRP1B  | SGK1     |
| BTK      | MEF2B  | SOCS1    |
| CARD11   | MYC    | SPEN     |
| CCND3    | MYD88  | STAT3    |
| CD58     | NFKBIA | STAT6    |
| CD79A    | NFKBIE | TAGAP    |
| CD79B    | NOTCH1 | TET2     |
| CREBBP   | NOTCH2 | TMSB4X   |
| DTX1     | P2RY8  | TNFAIP3  |
| EBF1     | PIK3CA | TNFRSF14 |
| EP300    | PIK3CD | TP53     |
| EZH2     | PIK3CG | TRAF6    |
| FOXO1    | PIK3R1 | UBE2A    |
| GNA13    | PIM1   |          |
| HIST1H1E | PLCG2  |          |

Three independent analyses were carried out for each sample. We first used the tools available in the Variant Reporter instrument (Illumina). A second variant calling was done with VarScan 2.3.9 to align the files extracted from two sources: (1) BWA Enrichment of Illumina Base Space, and (2) using the Burrows-Wheeler Aligner (BWA),



Picard, and Indel Realignment-Base Recalibration from the Genome Analysis Toolkit 3.8.1.0 (GATK).

Annotation was carried out with Annovar. All variants identified by the three complementary methods were visualized using an Integrative Genomics Viewer (Broad Institute and UC San Diego, San Diego, CA, USA. Data have been deposited in the Sequence Read Archive (SRA) (accession number GEO: PRJNA834596).

After annotation, the variants were subjected to additional, more stringent, and quality- and relevance-based filtering by the following criteria: quality read depth of bases  $\geq 50$ ; depth of variant-supporting bases  $\geq 5$ ; localization (exonic, UTRs and splice site); variant effect (non-synonymous); variant allele frequency  $\geq 5\%$  and not listed as a single nucleotide polymorphism, or listed but with an MAF  $< 0.01\%$  (The Exome Aggregation Consortium, 1000 Genomes Project of the International Genome Sample Resource (IGSR), Single Nucleotide Polymorphism Database (dbSNP) v138 of the National Center for Biotechnology Information (NCBI)).

#### References

1. Pasqualucci L, Trifonov V, Fabbri G, Ma J, Rossi D, Chiarenza A, *et al.* Analysis of the coding genome of diffuse large B-cell lymphoma. *Nat Genet* 2011;**43**(9):830-7 doi 10.1038/ng.892.
2. Morin RD, Mendez-Lago M, Mungall AJ, Goya R, Mungall KL, Corbett RD, *et al.* Frequent mutation of histone-modifying genes in non-Hodgkin lymphoma. *Nature* 2011;**476**(7360):298-303 doi 10.1038/nature10351.
3. Gonzalez-Rincon J, Mendez M, Gomez S, Garcia JF, Martin P, Bellas C, *et al.* Unraveling transformation of follicular lymphoma to diffuse large B-cell lymphoma. *PLoS One* 2019;**14**(2):e0212813 doi 10.1371/journal.pone.0212813.
4. Zhang J, Grubor V, Love CL, Banerjee A, Richards KL, Mieczkowski PA, *et al.* Genetic heterogeneity of diffuse large B-cell lymphoma. *Proc Natl Acad Sci U S A* 2013;**110**(4):1398-403 doi 10.1073/pnas.1205299110.
5. Pasqualucci L, Khiabani H, Fangazio M, Vasishtha M, Messina M, Holmes AB, *et al.* Genetics of follicular lymphoma transformation. *Cell Rep* 2014;**6**(1):130-40 doi 10.1016/j.celrep.2013.12.027.
6. Okosun J, Bodor C, Wang J, Araf S, Yang CY, Pan C, *et al.* Integrated genomic analysis identifies recurrent mutations and evolution patterns driving the initiation and progression of follicular lymphoma. *Nat Genet* 2014;**46**(2):176-81 doi 10.1038/ng.2856.
7. Morin RD, Assouline S, Alcaide M, Mohajeri A, Johnston RL, Chong L, *et al.* Genetic Landscapes of Relapsed and Refractory Diffuse Large B-Cell Lymphomas. *Clin Cancer Res* 2016;**22**(9):2290-300 doi 10.1158/1078-0432.CCR-15-2123.
8. Lohr JG, Stojanov P, Lawrence MS, Auclair D, Chapuy B, Sougnez C, *et al.* Discovery and prioritization of somatic mutations in diffuse large B-cell lymphoma (DLBCL) by whole-exome sequencing. *Proc Natl Acad Sci U S A* 2012;**109**(10):3879-84 doi 10.1073/pnas.1121343109.
